# Supplementary material for: High-performance electrocatalyst based on polyazine derived mesoporous nitrogen-doped carbon for oxygen reduction reaction
Source: Royal Society of Chemistry journal article supplement (doi:10.1039/d1ra03255k), 2021-01-01
Supplement: d1ra03255k1.pdf [file d1ra03255k1.pdf]

**Electronic Supplementary Information**

**High-performance electrocatalyst based on polyazine derived mesoporous  
nitrogen-doped carbon for oxygen reduction reaction**

Songlin Zhao<sup>a, b</sup>, Fushan Chen<sup>c</sup>, Qunfeng Zhang<sup>a\*</sup>

[a] College of Chemical Engineering, Zhejiang University of Technology, Hangzhou,  
Zhejiang 310014, China

[b] School of Pharmaceutical and materials Engineering, Taizhou University, Taizhou  
318000, China

[c] Jiangxi Province Engineering Research Center of Ecological Chemical Industry,  
Jiujiang University, Jiujiang 332005, China

\*Corresponding authors: zhangqf@zjut.edu.cn (Q. Zhang)

### S1. BET surface areas and pore volume variation with the pyrolytic temperature

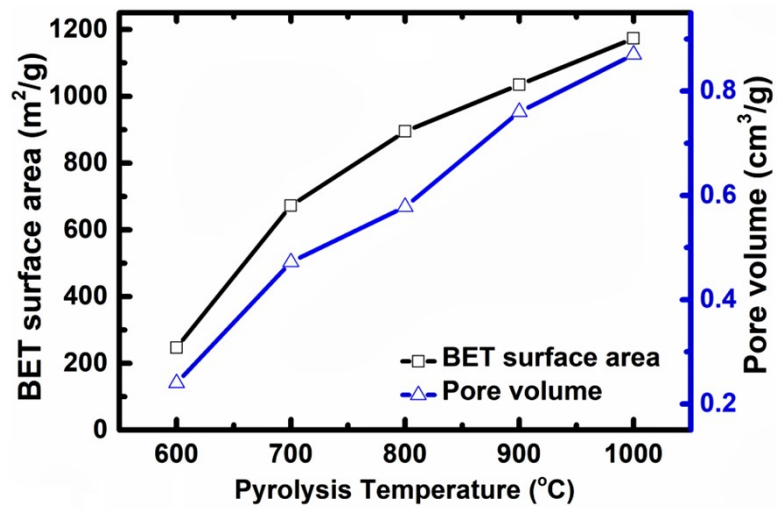

Figure S1 the BET surface areas and pore volume variation with the pyrolytic temperature

## **S2 Pyrolysis behavior of F127/PAZ composite**

Figure S1 shows the thermal decomposition of F127, PAZ and their composite from 25 °C to 998 °C in a nitrogen atmosphere, respectively. As shown, a major weight reduction of above 99% for F127 takes place as the temperature reached 410 °C, suggesting that the template can be totally destroyed at this stage. For the PAZ without the F127 template, a rapid weight loss was observed at the temperature range of 150–300 °C (around 45% weight loss), which indicates the cleavage of small molecules from the further condensation of the linear polymer to form a framework structure and facilitate carbonization. In the range of 400–995 °C, the carbonization is improved, accompanied by the gradual decomposition of carbonaceous residue with approximately 40% of further weight loss. In contrast, the profile of the 127/PAZ composite colligated the pyrolytic behaviour of both the PAZ and F127. Two significant weight loss stages can be observed in the temperature range of 150–280 °C and 300–410 °C, which are attributed to the partial destruction of PAZ and the complete decomposition of F127, respectively. The final carbon yield (atom efficiency toward the desired carbon structure) is about 12% of the composite when it

is heated up to 995 °C.

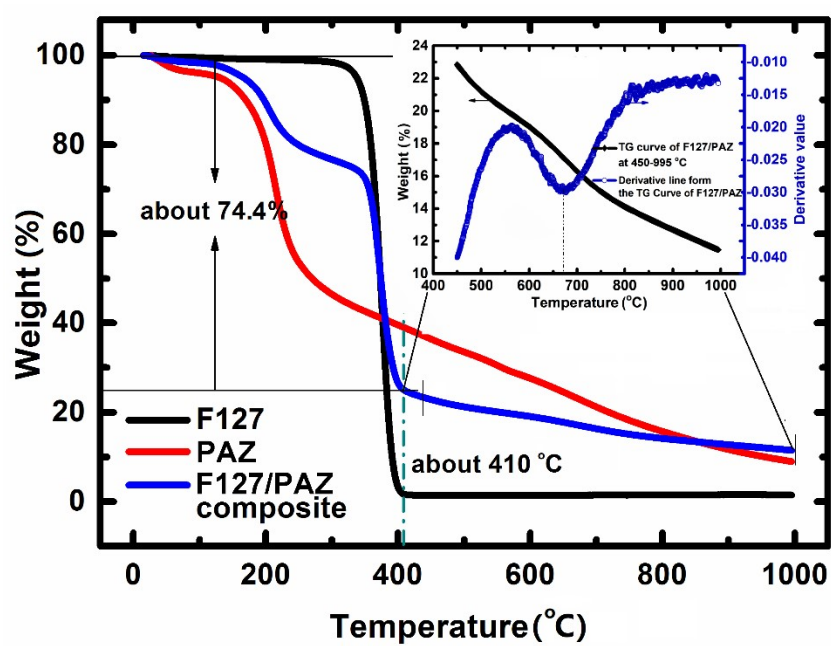

Figure S2 Thermogravimetric behaviors of the F127/PAZ composite compared to F127 and PAZ in N<sub>2</sub> atmosphere

Table S1 Comparison NMC-700 with previous reported metal free ORR catalytic in 0.1 M KOH at a scan rate of 5 or 10 mV/s with the RDE rotation rate of 1600 rpm.

| Materials                         | Precursors                 | Onset potential                                | <sup>a</sup> Relative half-wave potential | Tafel slopes               | H <sub>2</sub> O <sub>2</sub> yields | References   |
|-----------------------------------|----------------------------|------------------------------------------------|-------------------------------------------|----------------------------|--------------------------------------|--------------|
| N-doped graphene                  | ammonia                    | ca. 25 mV positive                             | 43 mV positive                            | -                          | ca. 10%                              | <sup>1</sup> |
| N-doped Carbon/graphene composite | polydopamine               | ca. 10 mV positive                             | 40 mV positive                            | -                          | 4.3-16.5%                            | <sup>2</sup> |
| N-doped carbon                    | ionic liquids              | ca. 25 mV negative                             | -                                         | -                          | -                                    | <sup>3</sup> |
| N, S-dual-doped graphene          | melamine, benzyl disulfide | ca. 30 mV negative                             | -                                         | -                          | -                                    | <sup>4</sup> |
| N-doped carbon                    | ZIF-8                      | -0.13 V vs. SCE (not compare with Pt catalyst) | -                                         | -                          | -                                    | <sup>5</sup> |
| N-doped carbon/CNT composite      | PANI                       | ca. 30 mV negative                             | 26 mV positive                            | 66 mV decade <sup>-1</sup> |                                      | <sup>6</sup> |
| N-doped carbon                    | Polyazine                  | ca. 6 mV negative                              | 90 mV negative                            | 87 mV decade <sup>-1</sup> | <5%                                  | This work    |

a. Compared with the results from commercial Pt (20 at.%) catalyst

**S3 Normalization of kinetic current at 0.875 V to the exposure indexes of nitrogen species for ORR.**

Table S2 Physical and chemical characteristic parameter of materials prepared under different pyrolysis temperature (PT)

| PT<br>(°C) | SSA<br>(m <sup>2</sup> g <sup>-1</sup> ) | Kinetic current densities at<br>0.875 V (mA cm <sup>-2</sup> ) | N-species containing (at. %)/EI <sup>a</sup> |            |
|------------|------------------------------------------|----------------------------------------------------------------|----------------------------------------------|------------|
|            |                                          |                                                                | pyridinic-N                                  | pyrrolic-N |
| 600        | 247                                      | 0.29                                                           | 8.21/430                                     | 1.74/2027  |
| 700        | 672                                      | 1.87                                                           | 4.08/652                                     | 0.97/2742  |
| 800        | 895                                      | 1.70                                                           | 2.46/438                                     | 0.49/2022  |
| 900        | 1034                                     | 0.62                                                           | 0.76/300                                     | 0.29/786   |
| 1000       | 1174                                     | 0.60                                                           | 0.56/235                                     | 0.2/657    |

a. The exposure indexes (*EI*) of the proposed active sites can be calculated as follows:

$EI = \text{SSA} \times \text{Nitrogen species containing (pyridinic-N or pyrrolic-N)}$ .

Normalization of  $J_{0.875 \text{ V}}$  to *EI* can be carried out as follows:

$$\text{nominal } J_{0.875 \text{ V}} = \frac{J_{0.875 \text{ V}} \times S_{\text{we}}}{EI} (\mu\text{A g m}^{-2})$$

Where  $S_{\text{we}}$  refers to the area of work electrode, the value is 0.19625 cm<sup>2</sup>.

#### S4 RRDE measurement

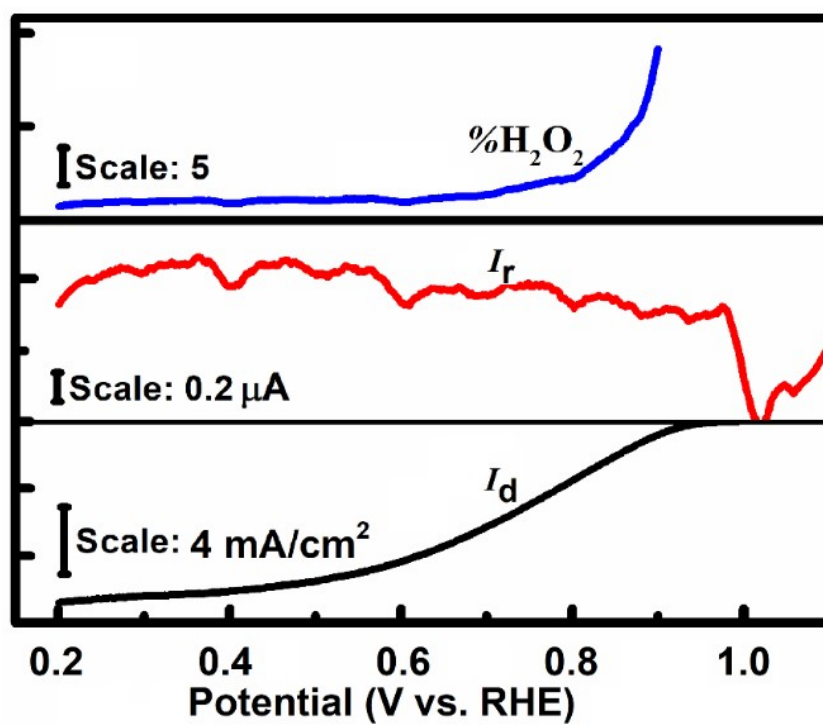

Figure S3 Rotating ring-disk electrode measurement combined with  $\text{H}_2\text{O}_2$  yield over

NMC-700 in  $\text{O}_2$ -saturated 0.1 M KOH solution at the rotation rate of 1600 rpm.

## References:

1. D. Geng, Y. Chen, Y. Chen, Y. Li, R. Li, X. Sun, S. Ye and S. Knights, *Energ. Environ. Sci.*, 2011, **4**, 760.
2. W. Wei, H. Liang, K. Parvez, X. Zhuang, X. Feng and K. Mullen, *Angewandte Chemie*, 2014, **53**, 1570-1574.
3. W. Yang, T. P. Fellingner and M. Antonietti, *J. Am. Chem. Soc.*, 2011, **133**, 206-209.
4. J. Liang, Y. Jiao, M. Jaroniec and S. Z. Qiao, *Angew. Chem. Int. Ed.*, 2012, **51**, 11496-11500.
5. M. Jiang, X. Cao, D. Zhu, Y. Duan and J. Zhang, *Electrochim. Acta*, 2016, **196**, 699-707.
6. J. C. Li, S. Y. Zhao, P. X. Hou, R. P. Fang, C. Liu, J. Liang, J. Luan, X. Y. Shan and H. M. Cheng, *Nanoscale*, 2015, **7**, 19201-19206.
